# Supplementary material for: Immobilizing water-soluble graphene quantum dots with gold nanoparticles for a low potential electrochemiluminescence immunosensor
Source: Royal Society of Chemistry journal article supplement (doi:10.1039/c5nr04328j), 2015-01-01
Supplement: c5nr04328j1.pdf [file c5nr04328j1.pdf]

## Supporting Information

### **Immobilizing water-soluble graphene quantum dots with gold nanoparticles for low potential electrochemiluminescence immunosensor**

*Yongqiang Dong, Huan Wu, Pengxiang Shang, Xiaoting Zeng, and Yuwu Chi\**

Ministry of Education Key Laboratory of Analysis and Detection Technology for Food Safety, Fujian Provincial Key Laboratory of Analysis and Detection Technology for Food Safety, and Department of Chemistry, Fuzhou University, Fujian 350108, China

\* Corresponding author. Email: [y.w.chi@fzu.edu.cn](mailto:y.w.chi@fzu.edu.cn); Tel/Fax: +86-591-22866137.

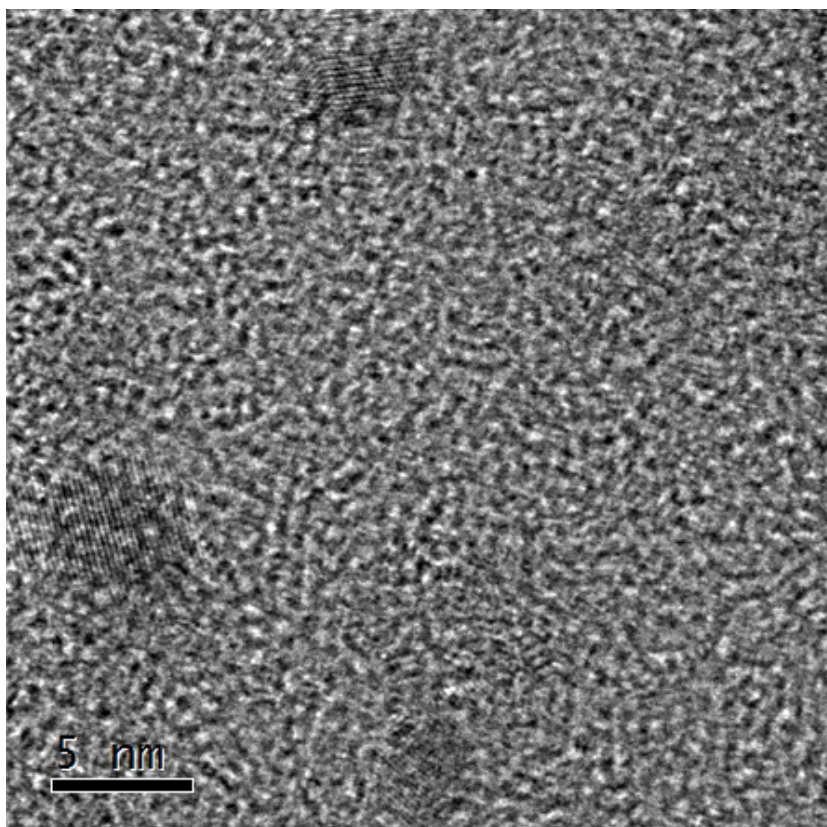

**Figure S1.** HRTEM of HM-GQDs.

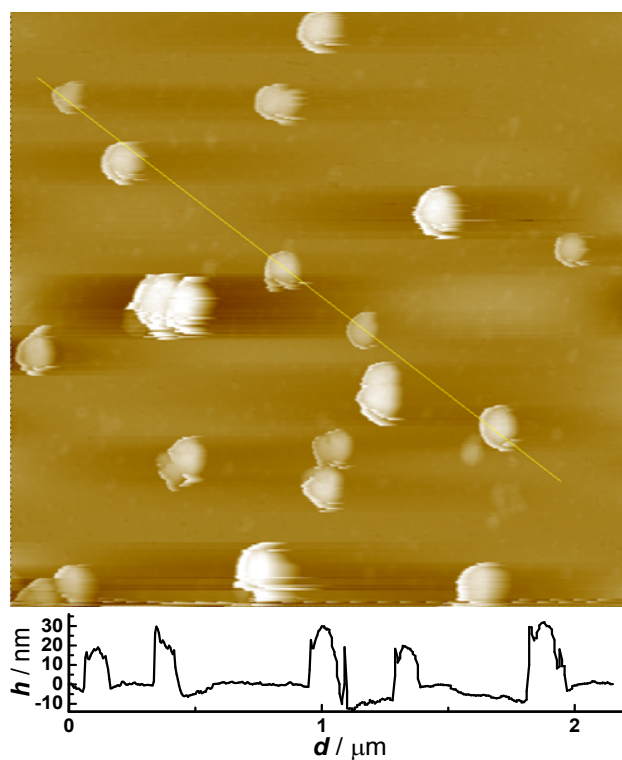

**Figure S2.** AFM image of HM-GQDs-AuNPs and height profile along the line in AFM image.

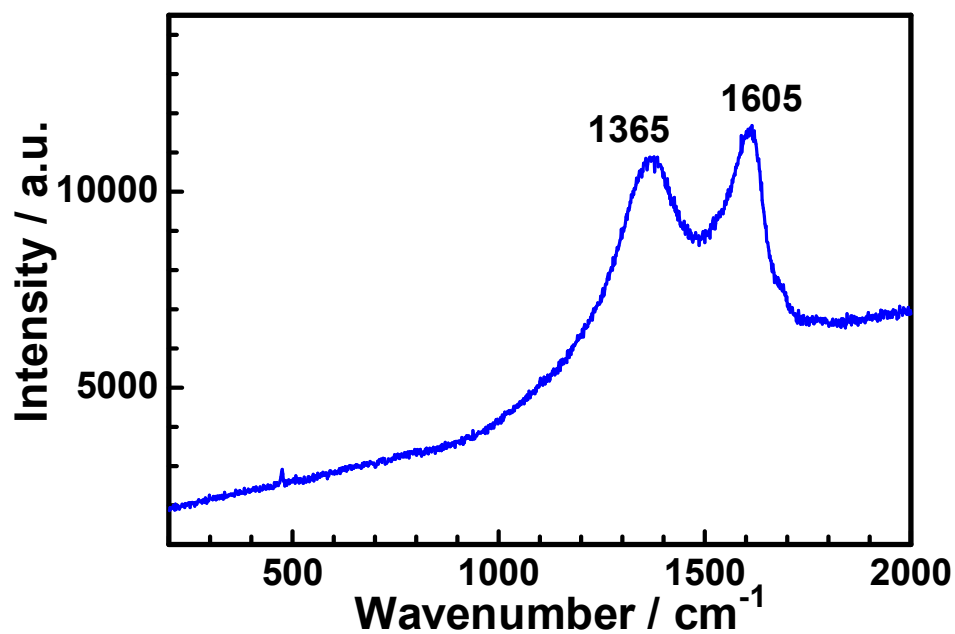

Figure S3. Raman spectrum of HM-GQDs-AuNPs.

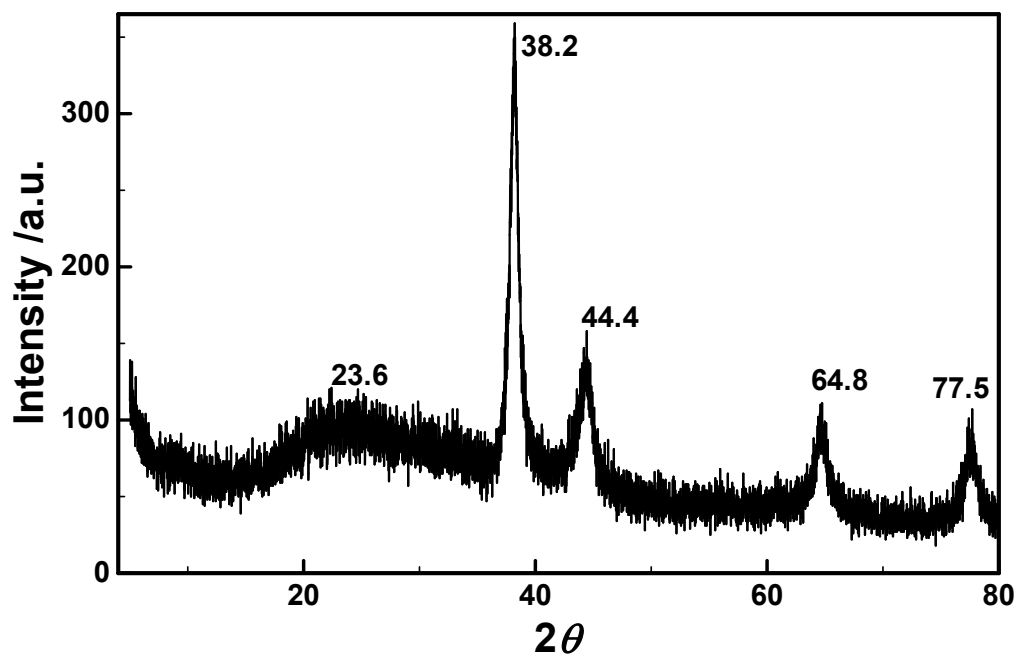

Figure S4. XRD pattern obtained for HM-GQDs-AuNPs.

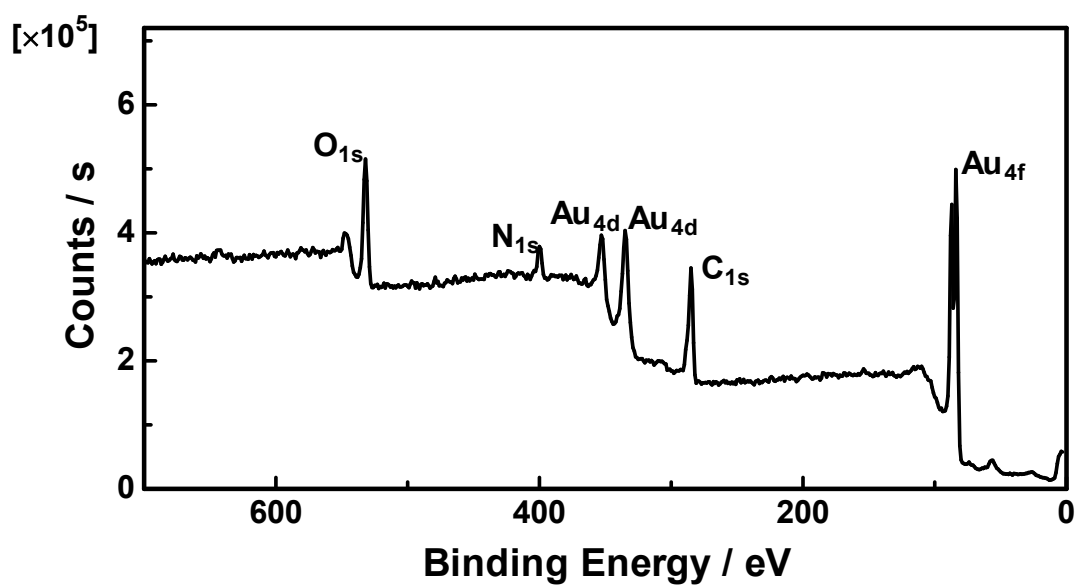

Figure S5. XPS spectra of HM-GQDs-AuNPs.

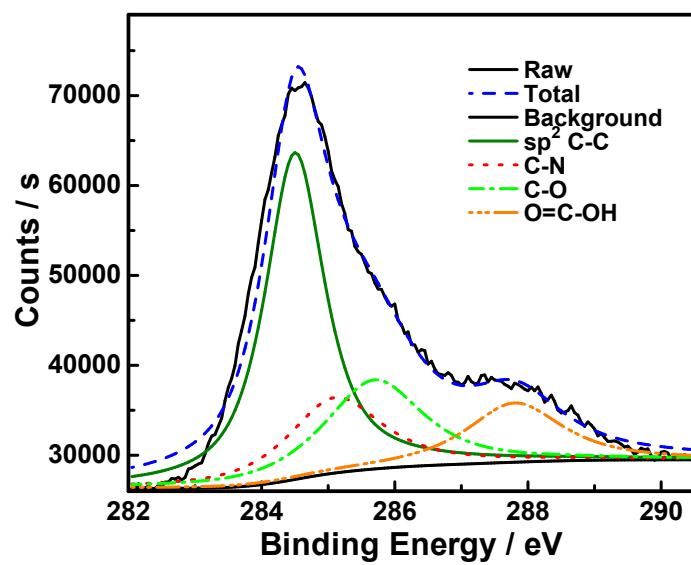

Figure S6. High resolution XPS spectra obtained for C1s.
